# Supplementary material
Source: PubMed Central journal article supplement (PMC4821799)
Supplement: NIHMS744279-supplement-01.pdf [file NIHMS744279-supplement-01.pdf]

**Supplemental Table 1: Demographics of participants of the EAGeR cohort achieving an hCG detected pregnancy**

| Characteristics                          | Total      | Low AMH<br><1.0<br>ng/ml | Normal AMH<br>1.0-3.5 ng/ml | High AMH<br>>3.5 ng/ml  | P Value <sup>a</sup> |
|------------------------------------------|------------|--------------------------|-----------------------------|-------------------------|----------------------|
| n (%)                                    | 769        | 80(10.4)                 | 376 (48.9)                  | 313 (40.7)              |                      |
| Age, y                                   | 28.7 ± 4.6 | 32.5 ± 4.8               | 29.0 ± 4.6                  | <sup>c</sup> 27.3 ± 4.0 | <0.001               |
| BMI, kg/m <sup>2</sup>                   | 25.5 ± 6.1 | 25.7 ± 6.6               | 25.7 ± 6.3                  | 25.1 ± 5.7              | 0.40                 |
| Race                                     |            |                          |                             |                         | 0.41                 |
| White                                    | 742 (96.5) | 79 (98.8)                | 364 (96.8)                  | 299 (95.5)              |                      |
| Non-White                                | 27 (3.5)   | 1(1.3)                   | 12 (3.2)                    | 14 (4.5)                |                      |
| Marital status                           |            |                          |                             |                         | 0.74                 |
| Living with partner                      | 27 (3.5)   | 4 (5)                    | 11 (2.9)                    | 12 (3.8)                |                      |
| Married                                  | 729 (94.8) | 74 (92.5)                | 359 (95.5)                  | 296 (94.6)              |                      |
| Other                                    | 13 (1.7)   | 2 (2.5)                  | 6 (1.6)                     | 5 (1.6)                 |                      |
| > High School Education                  | 686 (89.2) | 67 (83.8)                | 342 (91)                    | 277 (88.5)              | 0.15                 |
| Treatment                                |            |                          |                             |                         |                      |
| Placebo                                  | 372 (48.4) | 32 (40)                  | 189 (50.3)                  | 151 (48.2)              | 0.25                 |
| Low Dose Aspirin                         | 397 (51.6) | 48 (60)                  | 187 (49.7)                  | 162 (51.8)              |                      |
| Parity                                   |            |                          |                             |                         | 0.02                 |
| Nulliparous                              | 324 (42.1) | 33 (41.3)                | 141 (37.5)                  | 150 (47.9)              |                      |
| Parous (1 or 2 prior live births)        | 445 (57.9) | 47 (58.8)                | 235 (62.5)                  | 163 (52.1)              |                      |
| Number of previous pregnancy losses      |            |                          |                             |                         | 0.46                 |
| 1                                        | 505 (65.6) | 53 (66.3)                | 239 (63.6)                  | 213 (68.1)              |                      |
| 2                                        | 264 (34.3) | 27 (33.8)                | 137 (36.4)                  | 100 (31.9)              |                      |
| Gestational age of most recent loss, wks | 9.3 ± 4.8  | 9.5 ± 4.9                | 9.3 ± 4.8                   | 9.2 ± 4.7               | 0.83                 |
| Time from last loss to randomization     |            |                          |                             |                         | 0.06                 |
| ≤ 4 months                               | 453 (60.2) | 55 (69.6)                | 215 (58.7)                  | 183 (59.4)              |                      |
| 5-8 months                               | 132 (17.5) | 10 (12.7)                | 55 (15)                     | 67 (21.8)               |                      |
| 9-12 months                              | 52 (6.9)   | 5 (6.3)                  | 29(7.9)                     | 18 (5.8)                |                      |
| >12 months                               | 118 (15.4) | 10 (12.3)                | 68 (18.2)                   | 40 (12.9)               |                      |

<sup>a</sup>P -values based on Analysis of Variance (ANOVA) test for continuous variables, and  $\chi^2$  test (or Fisher's exact test when cell

**count <5) for categorical variables. Information was missing for BMI (n=9), gestational age of most recent loss (n=107), time from last loss to randomization (n=16).**

| <b>Supplemental Table 2: Definitions of Clinical Pregnancy loss</b>                                                                                                                                                                                                                                                                                                                                                    |
|------------------------------------------------------------------------------------------------------------------------------------------------------------------------------------------------------------------------------------------------------------------------------------------------------------------------------------------------------------------------------------------------------------------------|
| 1) <b>Pre-embryonic loss.</b> Loss at less than 10 weeks' gestation in which embryonic development does not occur: mean gestational sac diameter of $\geq 16$ mm without an embryo, mean gestational sac diameter of $\geq 8$ mm without a yolk sac, no visible embryo two weeks after detection of gestational sac of any size, or positive urine hCG with missed menses and no sac visible on sonogram.              |
| 2) <b>Embryonic loss.</b> Loss occurring before 10 weeks gestation with an embryo with crown rump length $\leq 30$ mm with no cardiac activity, or if an embryo was documented with a crown rump length $\leq 30$ mm and cardiac activity present, and a subsequent loss occurred prior to 10 weeks' gestation and no further ultrasound was done, then the loss was presumed to have occurred at the embryonic stage. |
| 3) <b>Fetal pregnancy loss.</b> Loss at 10 to 19 weeks' gestation or death of a fetus with crown rump length of $>30$ mm and composite mean gestational age based on biparietal diameter, abdominal circumference, and femur length of $<20$ weeks' gestation.                                                                                                                                                         |
| 4) <b>Stillbirth.</b> Loss occurring at or after 20 weeks' gestation, with the complete expulsion or extraction from its mother of a product of conception in which there is no breathing, beating of the heart, pulsation of the umbilical cord, or unmistakable movement of voluntary muscle.                                                                                                                        |
| 5) <b>Ectopic pregnancy.</b> An embryo that has implanted somewhere other than the uterus as confirmed by sonography, laparoscopy, or laparotomy.                                                                                                                                                                                                                                                                      |
| 6) <b>Pregnancy of unknown location.</b>                                                                                                                                                                                                                                                                                                                                                                               |
